# Supplementary material for: Dynamic modelling of an ACADS genotype in fatty acid oxidation – Application of cellular models for the analysis of common genetic variants
Source: PLOS journal article supplement (doi:10.1371/journal.pone.0216110), 2019-05-23
Supplement: S3 (10.1371/journal.pone.0216110.s003) [file journal.pone.0216110.s003]

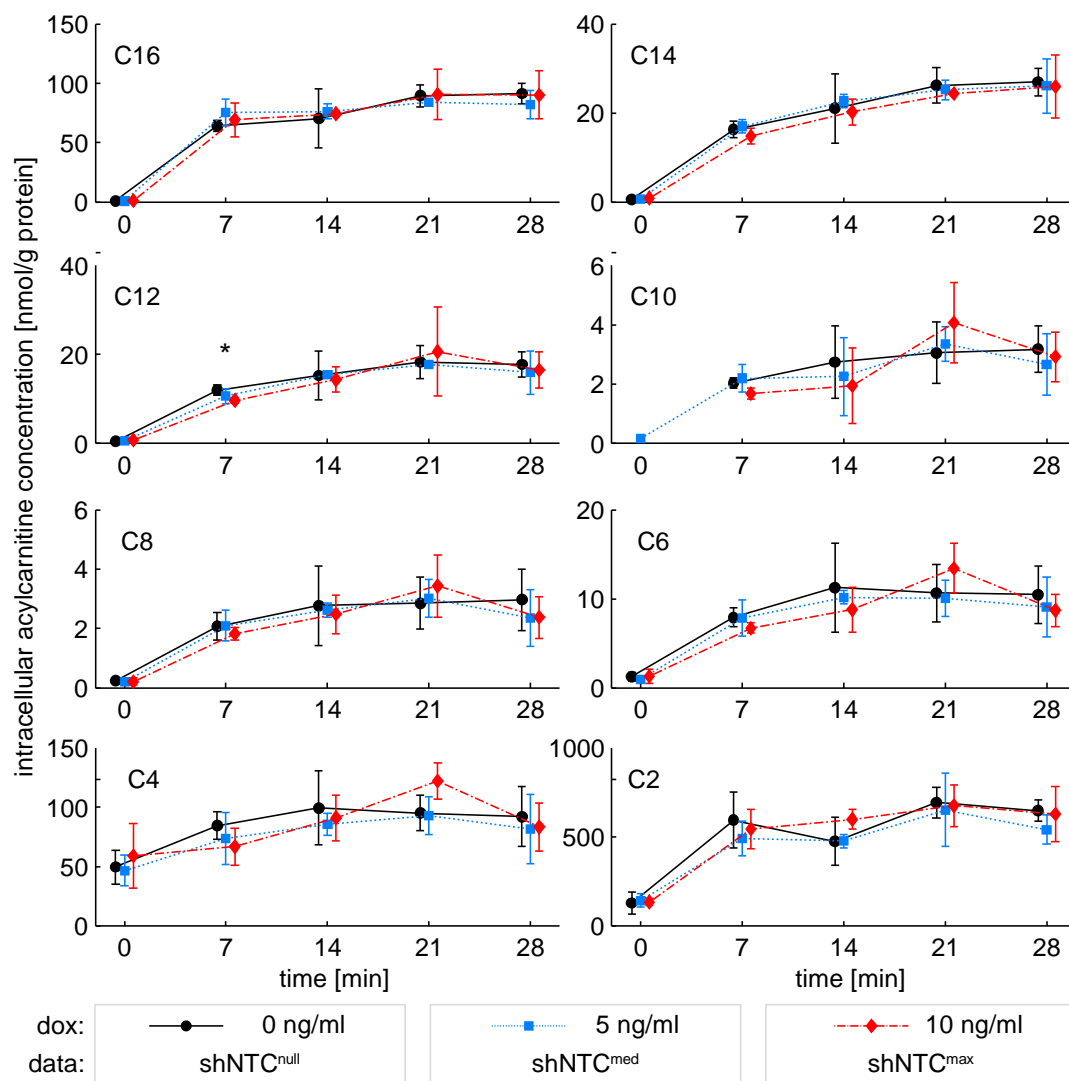

**S3 Fig. Time courses of intracellular acylcarnitines after palmitic acid loading in Huh7 cells with non-target shRNA.** Palmitic acid was added to induce fatty acid oxidation in cells transduced with a non-target shRNA. shNTC<sup>null</sup>, shNTC<sup>med</sup> and shNTC<sup>max</sup> cells treated with 0, 5 and 10 ng/mL doxycycline (dox), respectively, for shRNA induction. Intracellular acylcarnitines, assumed to represent acyl-CoAs with corresponding chain length, were extracted and measured before palmitic acid loading and after 7, 14, 21 and 28 min. Values of four independent experiments are expressed as mean  $\pm$  SD (original data of single measurements are given in S1B Table). ND: concentration not measured. Time point specific comparison between shNTC<sup>null</sup> and shNTC<sup>max</sup> using t-test with \* $p < 0.05$ .
